# Supplementary material for: Ikaros antagonizes DNA binding by STAT5 in pre-B cells
Source: PubMed Central journal article supplement (PMC7660478; doi:10.1371/journal.pone.0242211), 2020-11-12
Supplement: pone.0242211.s003.pdf [file pone.0242211.s003.pdf]

Fig 5a

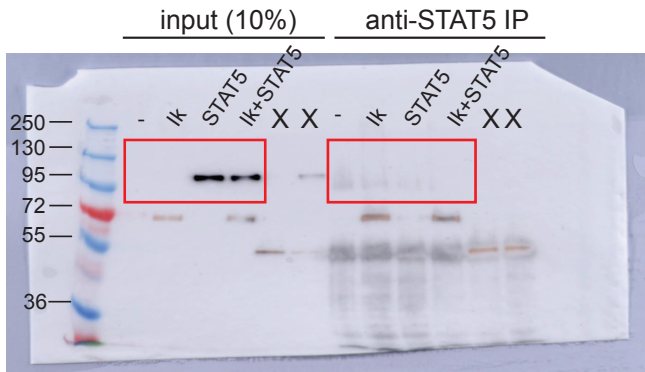

Fig 5b

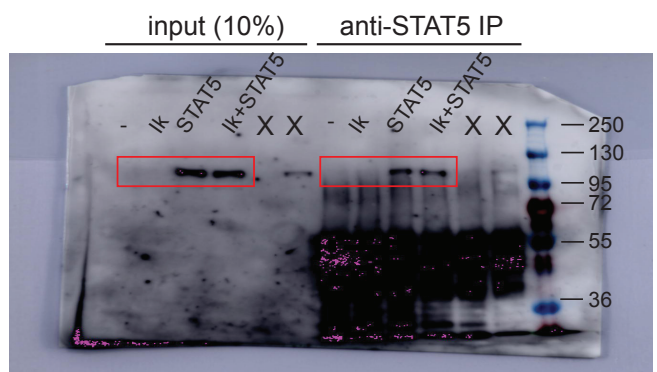

STAT5

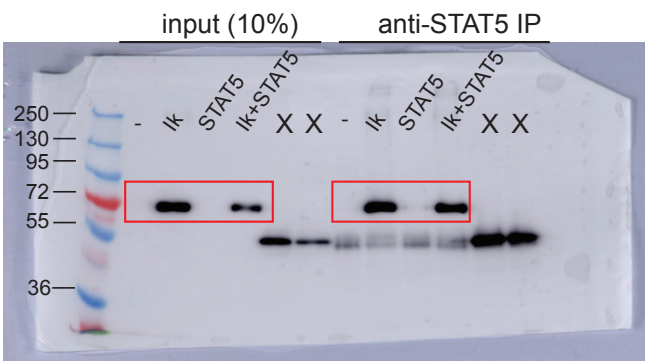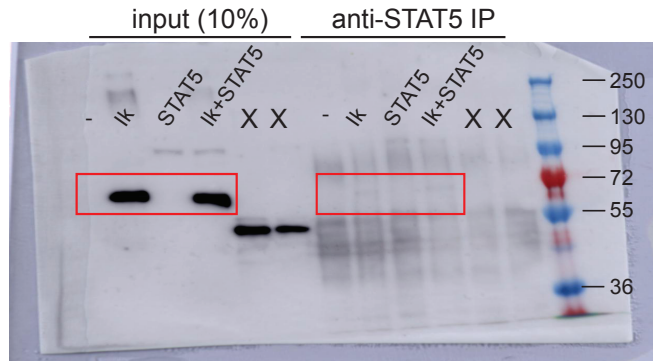

Ikaros

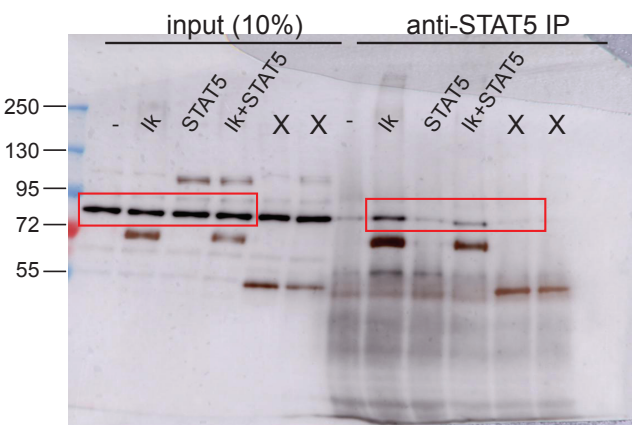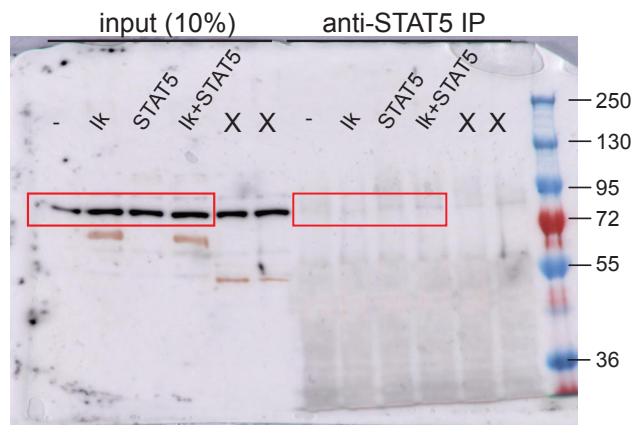

MTA2

Fig 6b

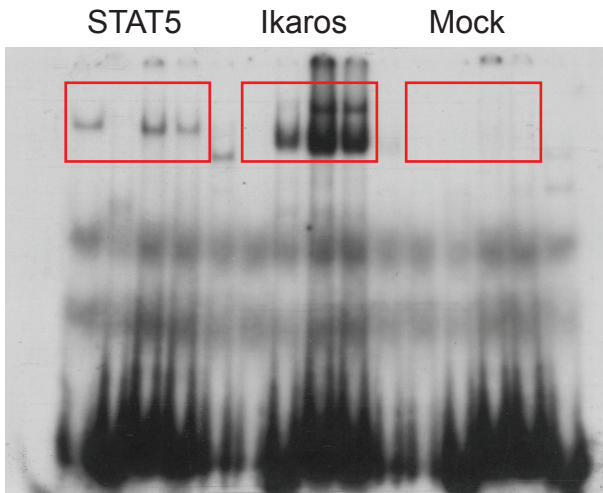

Fig 6c

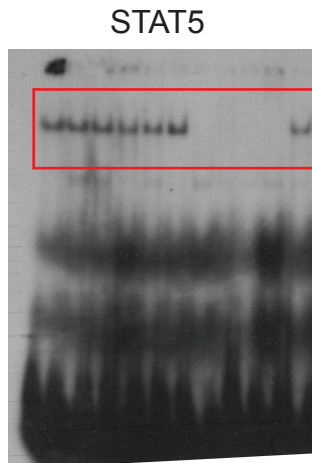

Fig 6c

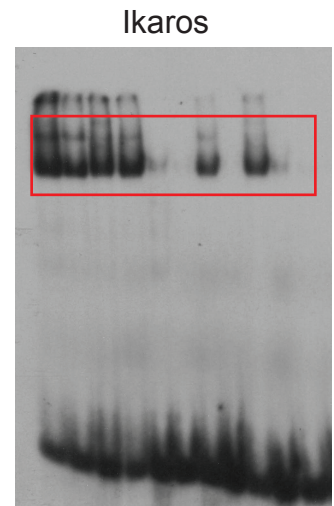

Fig 6f, left panels

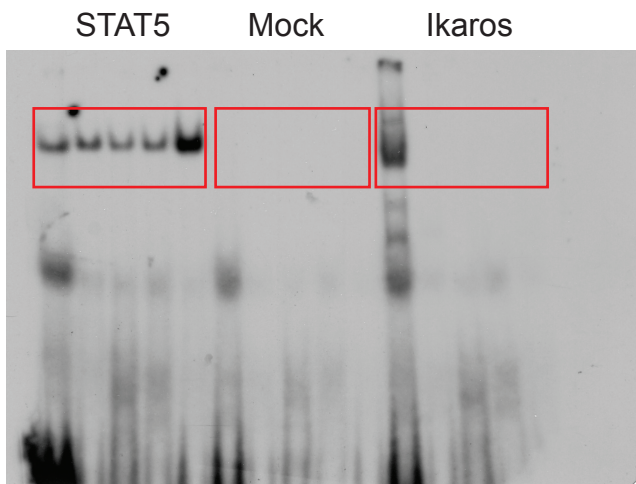

Fig 6f, right panels

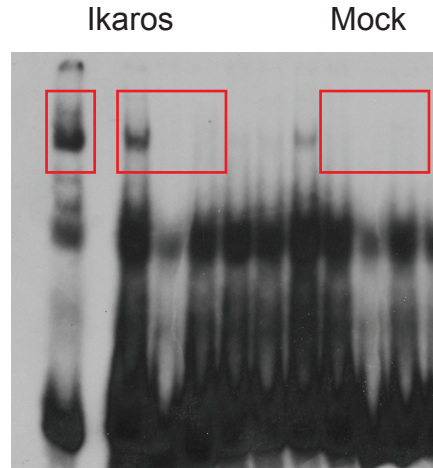

Fig 6g

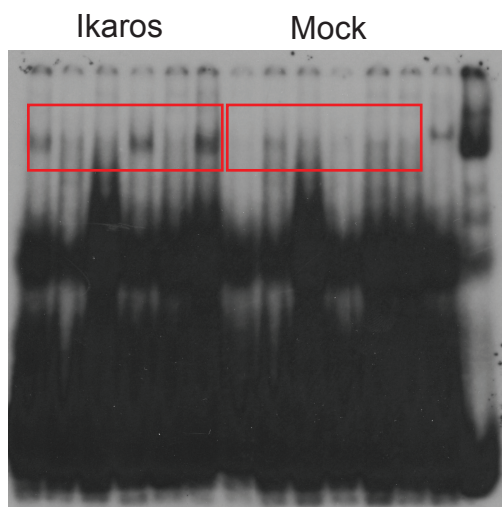

S1\_raw\_images
